# Supplementary material for: Adsorption of Brilliant Green Dye onto a Mercerized Biosorbent: Kinetic, Thermodynamic, and Molecular Docking Studies
Source: MDPI journal article supplement (doi:10.3390/molecules28104129), 2023-05-16
Supplement: s1 [file s1]

## Supplementary materials

**Table S1.** FTIR spectra absorption bands assignments for unmodified and alkali treated pistachio shells (PS and PS<sub>NaOH</sub>, respectively).

| FTIR assignments                                                                                                                                                                                                                                                                                           | Wavenumber (cm <sup>-1</sup> ) |                    | Ref.    |
|------------------------------------------------------------------------------------------------------------------------------------------------------------------------------------------------------------------------------------------------------------------------------------------------------------|--------------------------------|--------------------|---------|
|                                                                                                                                                                                                                                                                                                            | PS                             | PS <sub>NaOH</sub> |         |
| OH stretching vibrations from cellulose and lignin (free OH(6) and OH(2), O(2)H...O(6) and O(3)H...O(5) intramolecular hydrogen bonds, O(6)H...O(3) intermolecular hydrogen bonds in cellulose, intermolecular hydrogen bonds between lignin phenolic groups and their combinations with alcoholic groups) | 3393                           | 3343               | [40-44] |
| CH asymmetric stretching vibrations in lignin, cellulose and hemicellulose (aromatic methoxyl groups, methyl and methylene groups)                                                                                                                                                                         | 2925                           | 2920               |         |
| CH symmetric stretching vibrations in lignin, cellulose and hemicellulose                                                                                                                                                                                                                                  | 2902                           | 2894               |         |
| C=O stretching vibrations in hemicellulose and lignin (unconjugated ketone, carbonyl, and aliphatic groups)                                                                                                                                                                                                | 1733                           | 1744               |         |
| C=O stretching vibrations from aromatics skeletal in hemicellulose and lignin                                                                                                                                                                                                                              | 1648                           | 1644               |         |
| OH bending vibrations associated with absorbed water in lignin or hemicellulose                                                                                                                                                                                                                            |                                |                    |         |
| C=C aromatic stretching vibrations in lignin (syringyl)                                                                                                                                                                                                                                                    | 1612                           | 1599               |         |
| C=C aromatic stretching vibrations in lignin (guaiacyl)                                                                                                                                                                                                                                                    | 1507                           | 1503               |         |
| C-H asymmetric deformation in lignin (methyl and methylene)                                                                                                                                                                                                                                                | 1447                           | 1455               |         |
| O-H in-plane bending                                                                                                                                                                                                                                                                                       |                                |                    |         |
| C-H asymmetric deformation in -OCH <sub>3</sub>                                                                                                                                                                                                                                                            | 1429                           | 1421               |         |
| CH bending in cellulose and hemicellulose                                                                                                                                                                                                                                                                  | 1371                           | 1369               |         |
| CH <sub>2</sub> wagging in cellulose                                                                                                                                                                                                                                                                       | 1335                           | 1326               |         |
| C-O, C-C, C=O and guaiacyl ring stretching in lignin and C-O vibration of acetyl groups in hemicellulose                                                                                                                                                                                                   | 1238                           | 1235               |         |
| C-O-C asymmetric stretching in cellulose                                                                                                                                                                                                                                                                   | 1156                           | 1156               |         |
| C-O stretching in secondary alcohols and aliphatic ether in cellulose                                                                                                                                                                                                                                      | 1101                           | 1112               |         |
| aromatic C-H in-plane deformation in lignin (typical for syringyl units)                                                                                                                                                                                                                                   |                                |                    |         |
| C-O and C-C stretching ring in cellulose and hemicelluloses                                                                                                                                                                                                                                                | 1030                           | 1030               |         |
| C-C-O, C-O-C stretching of β(1→4)- glycosidic linkages and C-H bending in cellulose                                                                                                                                                                                                                        | 899                            | 896                |         |
| aromatic sp <sup>2</sup> bending of (C-H) from lignin                                                                                                                                                                                                                                                      | 831                            | 833                |         |
| C-C skeleton vibration                                                                                                                                                                                                                                                                                     | 748                            | -                  |         |
| C-OH out-of-plane bending                                                                                                                                                                                                                                                                                  |                                |                    |         |
| O-C-O in-plane deformation                                                                                                                                                                                                                                                                                 | 655                            | 645                |         |

**Table S2.** Surface parameters of PS and PS<sub>NaOH</sub> samples evaluated based on dynamic vapors sorption measurements: water vapor sorption capacity, final weight (W); average pore size ( $p_s$ ), surface area (A) and monolayer weight ( $W_m$ ).

| Biosorbent         | W (%) | BET data        |                        | BJH model         |
|--------------------|-------|-----------------|------------------------|-------------------|
|                    |       | Monolayer       | Area                   | Average pore size |
|                    |       | ( $W_m$ , mg/g) | (A, m <sup>2</sup> /g) | ( $p_s$ , nm)     |
| PS                 | 19.58 | 92.15           | 323.5                  | 1.210             |
| PS <sub>NaOH</sub> | 19.79 | 72.12           | 253.2                  | 1.563             |

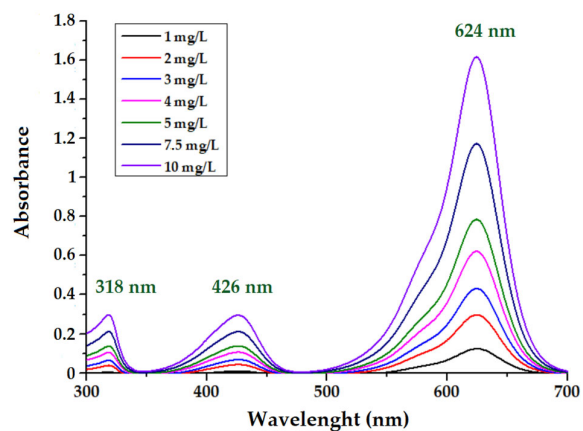

(a)

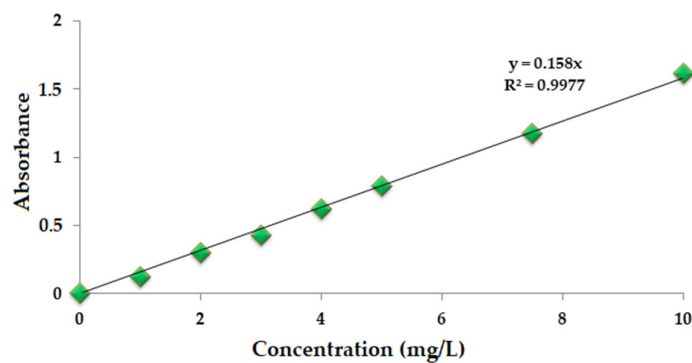

(b)

**Figure S1.** (a) Determination of maximum absorbance wavelengths for Brilliant green cationic dye; (b) Calibration curve graphical representation of at a wavelength of 624 nm (concentration range of 0-10 mg/L).

**Table S3.** Kinetic models equations and parameters\* for BG dye adsorption onto PS<sub>NaOH</sub> biosorbent (experimental conditions: T = 300 K, sorbent dose = 4 g/L, C<sub>0</sub> = 50 mg/L).

| Kinetic Model | Non-Linear Equation <sup>1</sup>                | Kinetic parameters <sup>2</sup>                                        | Experimental value of<br>absorption capacity<br>(mg/g) |
|---------------|-------------------------------------------------|------------------------------------------------------------------------|--------------------------------------------------------|
| PFO           | $q_t = q_e(1 - e^{-k_1 t})$                     | $q_e = 11.74$ (mg/g)<br>$k_1 = 0.60 \times 10^{-1}$<br>$\chi^2 = 0.28$ | $q_e^{(obs)} = 11.49$ (mg/g)                           |
| PSO           | $q_t = \frac{k_2 q_e^2 t}{1 + k_2 q_e t}$       | $q_e = 12.94$ (mg/g)<br>$k_2 = 0.61 \times 10^{-2}$<br>$\chi^2 = 0.74$ |                                                        |
| ID            | $q_t = k_d \sqrt{t} + J$                        | $k_d = 0.76$<br>$J = 2.58$<br>$\chi^2 = 6.44$                          |                                                        |
| Elovich       | $q_t = \frac{1}{\beta} \ln(1 + \alpha \beta t)$ | $\alpha = 2.33$<br>$\beta = 0.41$<br>$\chi^2 = 2.10$                   |                                                        |

<sup>1</sup>  $q_e$  and  $q_t$  are the amounts of BG dye adsorbed at equilibrium and at time  $t$ , respectively (mg/g);  $k_1$  and  $k_2$  are the pseudo-first-order and pseudo-second order rate constants;  $t$  is the contact time between the adsorbent and adsorbate (min);  $k_d$  is the intra-particle rate constant (mg/g · min<sup>1/2</sup>) and  $J$  is the intercept of intraparticle diffusion kinetic model;  $\beta$  gives the number of available sites for adsorption and  $\alpha$  is the initial adsorption rate (mg/ g · min) [46,49].

<sup>2</sup> Chi-square ( $\chi^2$ ) statistic test was calculated using Equation S1:

$$\chi^2 = \sum (q_e^{(obs)} - q_e^{(calc)})^2 / q_e^{(calc)}, \quad (S1)$$

where,  $q_e^{(obs)}$  and  $q_e^{(calc)}$  represent the observed (experimental) and the calculated (theoretical) values of adsorption capacity (mg/g).

**Table S4.** Isotherm models (equations and parameters) for BG cationic dye adsorption onto PS<sub>NaOH</sub> biosorbent (t = 240 min, sorbent dose = 4 g/L).

| Temperature                 | Isotherm models and parameters <sup>1</sup> |                         |                                                         |                          |                               |
|-----------------------------|---------------------------------------------|-------------------------|---------------------------------------------------------|--------------------------|-------------------------------|
|                             | Langmuir                                    | Freundlich              | Sips <sup>2</sup>                                       | Temkin                   | Dubinin-Radushevich           |
|                             | $q_e = \frac{q_m K_L C_e}{1 + K_L C_e}$     | $q_e = K_F C_e^{1/n_F}$ | $q_e = \frac{q_s K_S C_e^{1/n_S}}{1 + K_S C_e^{1/n_S}}$ | $q_e = B_T \ln(K_L C_e)$ | $E_s = \frac{1}{\sqrt{2K_D}}$ |
| <b>T = 300 K</b><br>(27 °C) | $q_m = 54.744$ (mg/g)                       |                         | $q_s = 57.224$                                          |                          |                               |
|                             | $K_L = 0.123$ (L/mg)                        | $K_F = 15.138$          | $K_S = 0.158$                                           | $K_T = 5.329$            | $K_D = 2.901 \times 10^{-3}$  |
|                             | $R_L = 0.116$                               | $n_F = 4.128$           | $n_S = 1.194$                                           | $B_T = 7.591$            | $E_s = 13.127$ (kJ/mol)       |
|                             | $\chi^2 = 11.478$                           | $\chi^2 = 49.770$       | $\chi^2 = 11.320$                                       | $\chi^2 = 25.704$        | $r^2 = 0.955$                 |
| <b>T = 330 K</b><br>(57 °C) | $q_m = 48.474$ (mg/g)                       |                         | $q_s = 64.045$                                          |                          |                               |
|                             | $K_L = 0.078$ (L/mg)                        | $K_F = 11.152$          | $K_S = 0.140$                                           | $K_T = 4.928$            | $K_D = 2.882 \times 10^{-3}$  |
|                             | $R_L = 0.160$                               | $n_F = 3.673$           | $n_S = 1.785$                                           | $B_T = 6.509$            | $E_s = 13.171$ (kJ/mol)       |
|                             | $\chi^2 = 20.330$                           | $\chi^2 = 19.993$       | $\chi^2 = 12.258$                                       | $\chi^2 = 18.040$        | $r^2 = 0.975$                 |

<sup>1</sup>  $q_e$  is the adsorbed amount of BG at the equilibrium (mg/g);  $C_e$  represents the equilibrium concentration of BG in solution (mg/L); Chi-square statistic test ( $\chi^2$ ) is calculated based on equation S1;  $q_m$  and  $q_s$  are the theoretical Langmuir and Sips maximum adsorption capacities (mg/g);  $K_L$ ,  $K_F$ ,  $K_S$ ,  $K_T$  and  $K_D$  are constants corresponding to each isotherm model;  $R_L$  is the separation factor calculated according to Equation S2;  $n_F$  is the surface heterogeneity factor;  $c$  is Sips isotherm exponent;  $B_T$  is related to heat of adsorption (J/mol);  $E_s$  is the mean free energy (kJ/mol) and  $r^2$  is the correlation coefficient (mol<sup>2</sup>/k<sup>2</sup>) [40,46].

<sup>2</sup> The decrease of  $1/n_S$  values from 0.84 (at 300 K) to 0.56 (at 330 K) suggests that the increase of temperature might enhance the surface heterogeneity [40].

**The dimensionless separation factor  $R_L$**  (equilibrium parameter) is calculated based on Langmuir model constant ( $K_L$ ), and was represented as the average of the calculated values for each initial dye concentrations (from 10 to 500 mg/L):

$$R_L = \frac{1}{1 + K_L C_0} , \quad (S2)$$

where  $K_L$  is the Langmuir adsorption constant and  $C_0$  represents the initial dye concentration. The  $R_L$  parameter value provides information about the nature of the adsorption process ( $R_L = 0$  indicates an irreversible adsorption,  $R_L$  ranging between 0 and 1 suggests a favorable absorption and  $R_L = 1$  denotes a linear unfavorable absorption) [46].

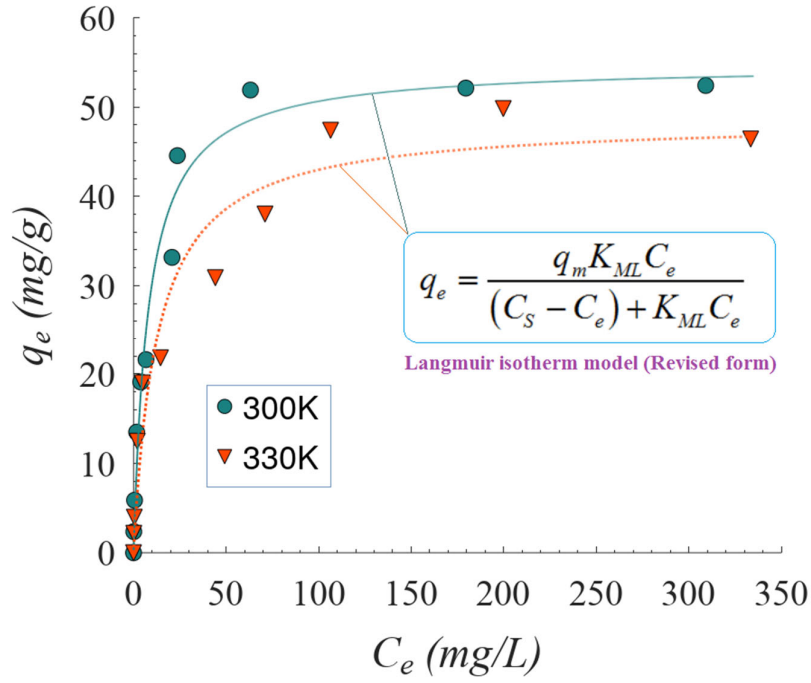

**Figure S2.** Adsorption isotherms data fitted to the revised Langmuir isotherm model (Azizian approach [36]), showing the adsorption equilibrium established between the surface of pistachio shells adsorbent and Brilliant green (BG) cationic dye; water solubility of BG dye is  $C_s = 1 \times 10^5$  mg/L.

**Table S5.** Parameters of the revised Langmuir isotherm model determined for BG dye adsorption onto  $PS_{NaOH}$  bio-sorbent ( $C_s = 1 \times 10^5$  mg/L (solubility for BG dye)).

| Temperature, T (K) | $q_m$<br>(mg/g) | $K_{ML}$<br>(dimensionless) | $\chi^2$ -test (error function) |
|--------------------|-----------------|-----------------------------|---------------------------------|
|--------------------|-----------------|-----------------------------|---------------------------------|

|      |        |                      |        |
|------|--------|----------------------|--------|
| 300K | 54.743 | $1.2362 \times 10^4$ | 8.534  |
| 330K | 48.491 | $7.7868 \times 10^3$ | 20.701 |

Note:  $C_s=1 \times 10^5$  mg/L or 0.2072 mol/L (solubility for BG dye)

**Table S6.** Analysis of variance (ANOVA) for the multiple regression model  $\hat{Y}(x_1, x_2)$ .

| Source   | DF <sup>(a)</sup> | SS <sup>(b)</sup> | MS <sup>(c)</sup> | F-value <sup>(d)</sup> | P-value <sup>(e)</sup> | R <sup>2</sup> <sup>(f)</sup> | R <sub>adj</sub> <sup>2</sup> <sup>(g)</sup> |
|----------|-------------------|-------------------|-------------------|------------------------|------------------------|-------------------------------|----------------------------------------------|
| Model    | 5                 | 7649.13           | 1529.83           | 26.51                  | 0.0013                 | 0.963                         | 0.927                                        |
| Residual | 5                 | 288.58            | 57.72             |                        |                        |                               |                                              |
| Total    | 10                | 7937.71           |                   |                        |                        |                               |                                              |

<sup>(a)</sup> degree of freedom; <sup>(b)</sup> sum of squares; <sup>(c)</sup> mean square; <sup>(d)</sup> ratio between mean squares;

<sup>(e)</sup> probability of randomness; <sup>(f)</sup> coefficient of determination; <sup>(g)</sup> adjusted coefficient of determination;

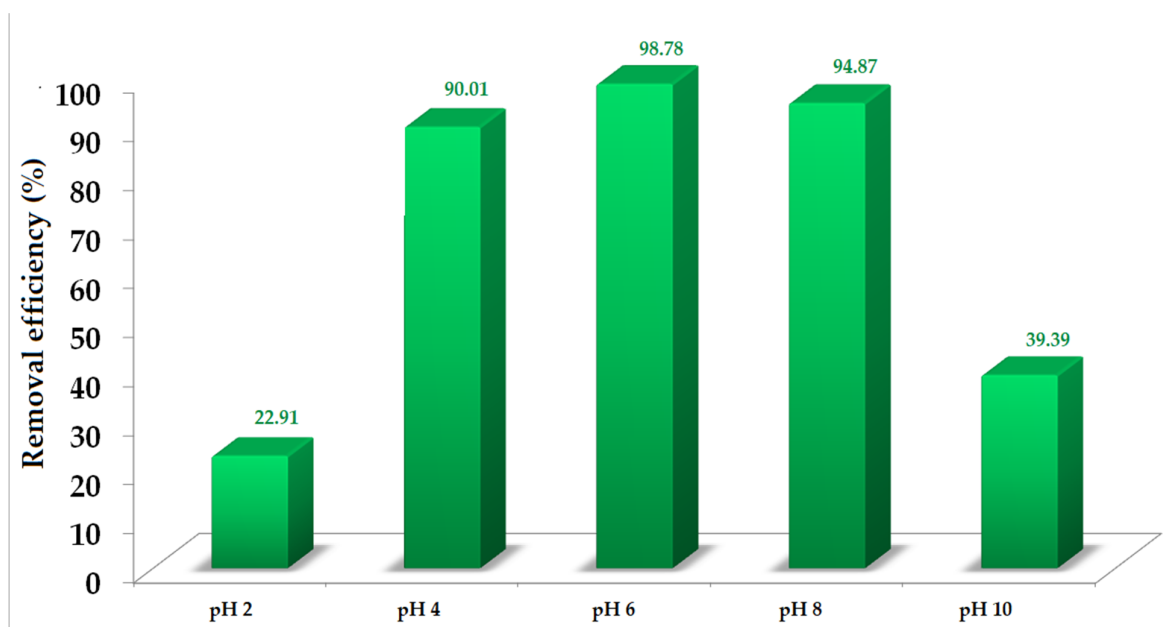

**Figure S3.** Effect of pH: removal efficiency of Brilliant Green (BG) from aqueous solutions of pH 2 and 4 (adjusted with 0.1M  $\text{H}_2\text{SO}_4$ ) and pH 8 and 10 (adjusted with 0.1M  $\text{NaOH}$ ) compared to naturally pH 6; optimal experimental conditions:  $SD = 4 \text{ g/L}$ ,  $C_0 = 10 \text{ mg/L}$ ,  $V = 50 \text{ mL}$ ,  $t = 240 \text{ min}$ ).

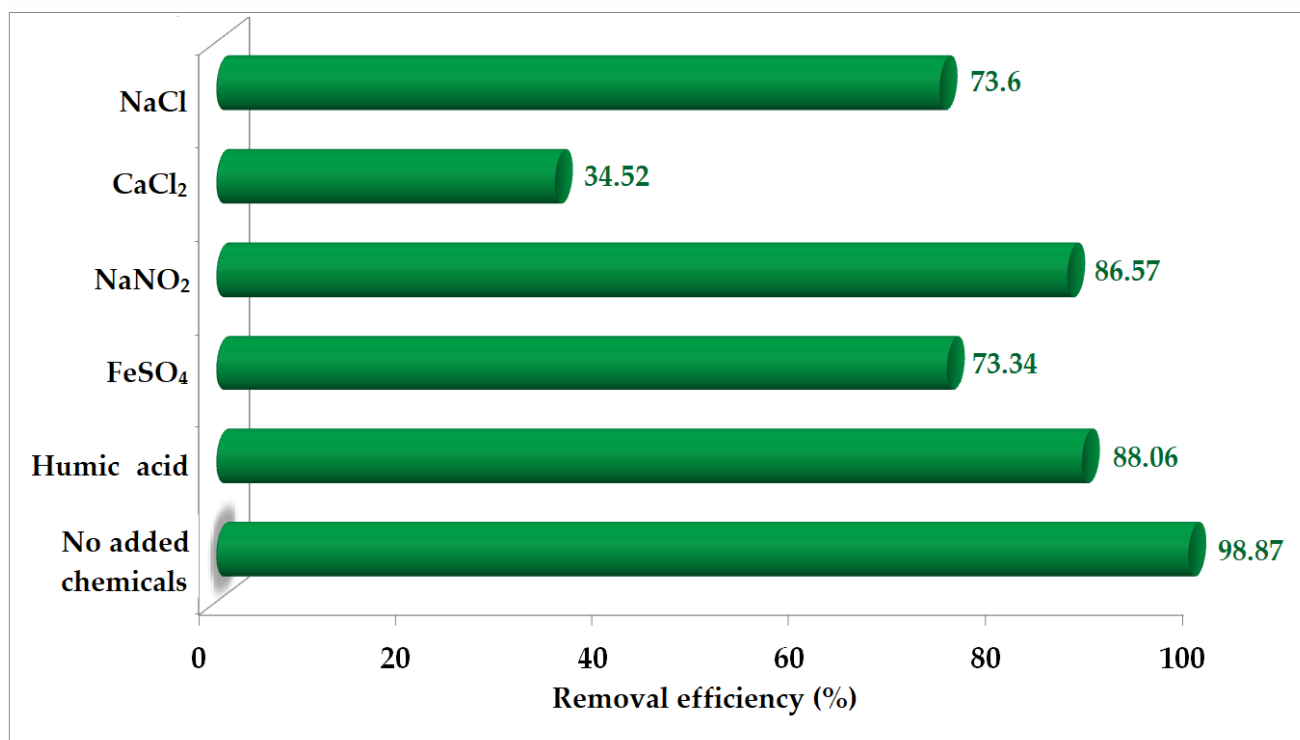

**Figure S4.** Removal efficiency of Brilliant Green (BG) from aqueous solutions in the presence of different salts (200 mg/L NaCl, CaCl<sub>2</sub>, NaNO<sub>2</sub>, or FeSO<sub>4</sub>), and in the presence of organic matter (20 mg/L humic acid); optimal experimental conditions:  $SD = 4$  g/L,  $C_0 = 10$  mg/L,  $V = 50$  mL,  $t = 240$  min.



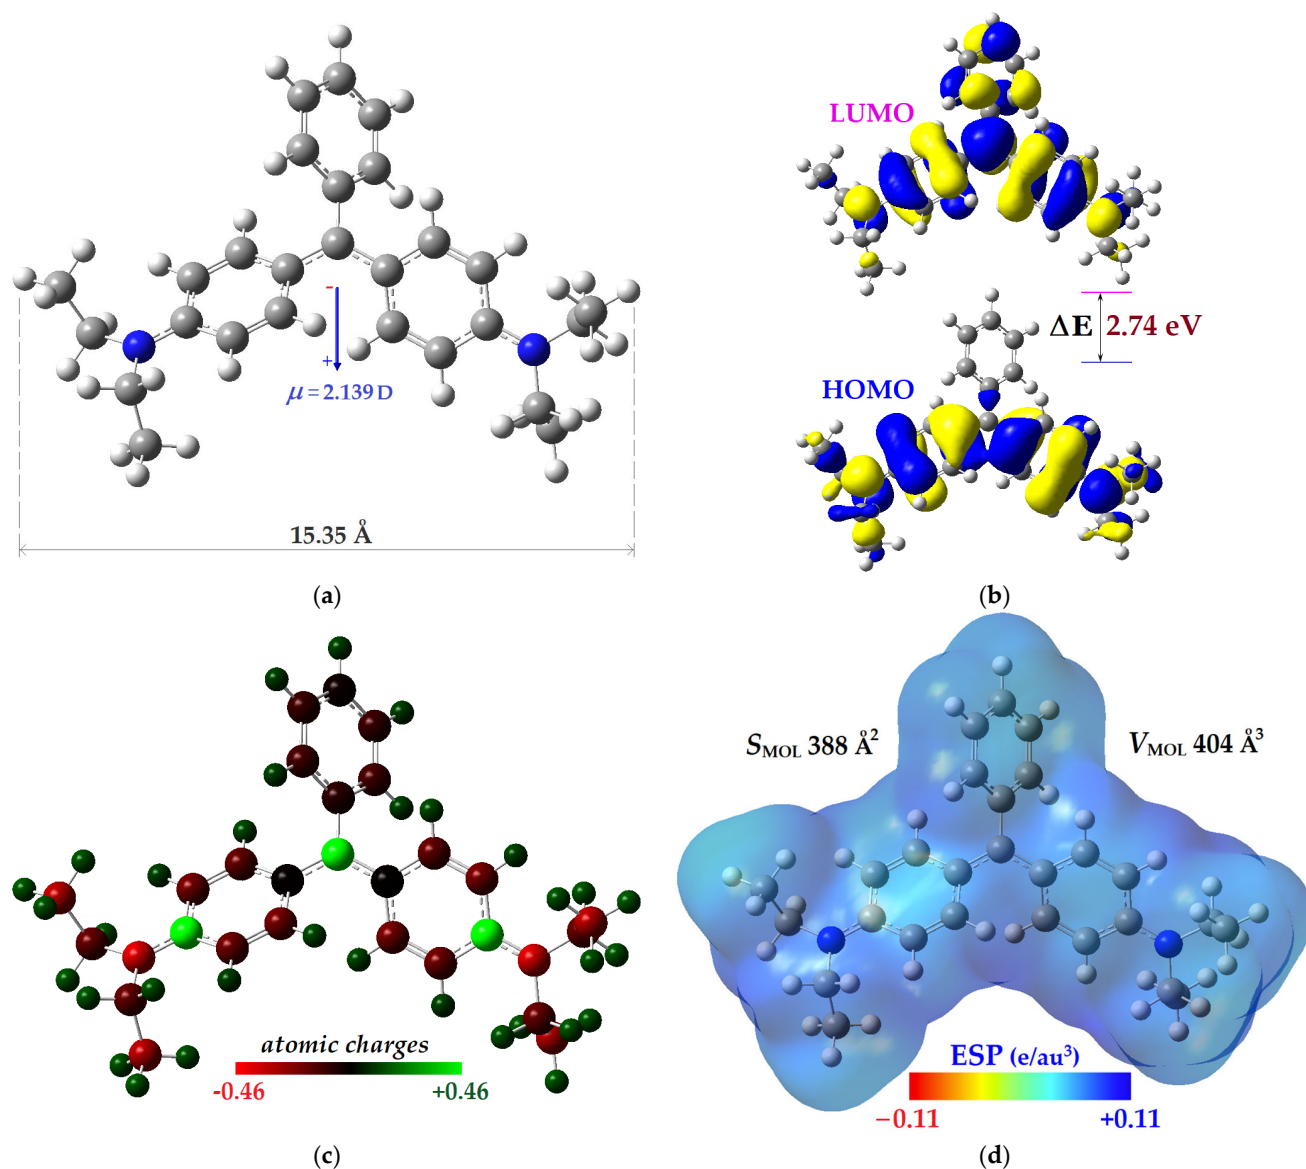

**Figure S5.** Molecular structure and particularities of BG molecule estimated computationally at DFT/APFD/6-311G(2d,p) level of theory for ground state  $S_0$  (charge = +1, singlet): (a) optimized geometry and dipole moment; (b) frontier molecular orbitals (HOMO, LUMO); (c) partial atomic charges (Mulliken) distribution; (d) electrostatic potential (ESP) map.

The results of DFT computations comprise: the optimal geometry and dipole moment orientation for the BG molecule (Figure S5a), the patterns of the frontier molecular orbitals HOMO, LUMO (Figure S5b); the distribution of the partial atomic charges (Figure S5c); and the electrostatic potential (ESP) map in the vicinity of the molecular surface of BG (Figure S5d). Computational results unveiled the following features for the BG molecule, size of  $15.35$  Å and a dipole moment equal to  $2.139$  Debye (Figure S5a). The lobes of molecular orbitals (HOMO and LUMO) are delocalized onto aromatic rings, indicating a  $\pi$ -conjugated system. Hence, the configuration HOMO→LUMO was associated to  $\pi \rightarrow \pi^*$  electronic transition, revealing an energy gap equal to  $2.74$  eV (Figure S5b). Partial atomic charges (Mulliken) for the BG molecule are given in Figure S5c and rendered as color gradient. The estimated electrostatic potential (ESP) surrounding the BG molecule (cationic form) is depicted in Figure S5d. Thus, BG cationic dye with a molecular surface equal to  $388$  Å<sup>2</sup> (and a molecular volume of  $404$  Å<sup>3</sup>) carries a positive electrostatic potential (Figure S5d). Additional molecular and reactivity descriptors for BG molecule (cationic form) are summarized in Table S7.

**Table S7.** Summary of molecular and global reactivity descriptors for BG molecule (cationic form); descriptors computed by DFT method at APFD/6-311G(2d,p) level of theory.

| Molecular / Reactivity Descriptor                                                     | BG molecule (cationic form)                 |
|---------------------------------------------------------------------------------------|---------------------------------------------|
| Empirical formula                                                                     | $\text{C}_{27}\text{H}_{33}\text{N}_2$      |
| System description                                                                    | 62 atoms, 208 electrons, +1 charge, singlet |
| Molecular mass (amu)                                                                  | 385.26                                      |
| LUMO energy, $\varepsilon_{\text{LUMO}}$ , (eV)                                       | -5.564                                      |
| HOMO energy, $\varepsilon_{\text{HOMO}}$ , (eV)                                       | -8.301                                      |
| Energy gap: $\Delta E = \varepsilon_{\text{LUMO}} - \varepsilon_{\text{HOMO}}$ , (eV) | 2.737                                       |
| Ionization potential: $I \approx -\varepsilon_{\text{HOMO}}$ , (eV)                   | 8.301                                       |
| Electron affinity: $A \approx -\varepsilon_{\text{LUMO}}$ , (eV)                      | 5.564                                       |
| Electronegativity: $\chi = \frac{1}{2}(I + A)$ , (eV)                                 | 6.933                                       |
| Chemical potential: $\mu = -\chi$ , (eV)                                              | -6.933                                      |
| Chemical hardness: $\eta = \frac{1}{2}(I - A)$ , (eV)                                 | 1.369                                       |
| Chemical softness: $S = 1/\eta$ , ( $\text{eV}^{-1}$ )                                | 0.731                                       |
| Electrophilicity index: $\omega = \mu^2/2\eta$ , (eV)                                 | 17.557                                      |

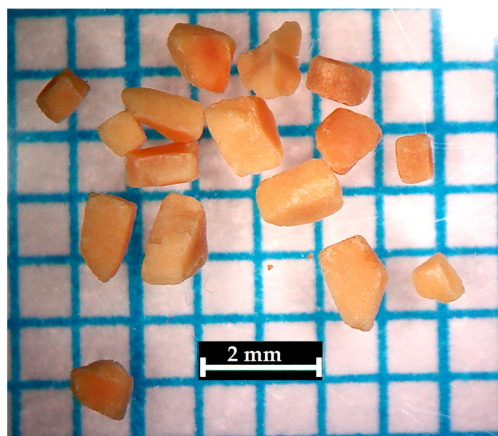

**Figure S6.**  $\text{PSNaOH}$  grains image obtained by optical microscope (Conrad USB, Wels, Austria).
